# Supplementary material
Source: Elsevier journal article supplement (https://www.sciencedirect.com/science/article/pii/S2173572718301681)

## SUPPLEMENTARY MATERIAL

### Levosimendan in patients with cardiogenic shock complicating myocardial infarction: a meta-analysis

Fang Mingxing, MD; Cao Hui, MD; Wang Zhiyong.

#### SUMMARY:

- Full PubMed search strategy
- Major exclusions and reasons for exclusions; Supplemental references
- Study quality and risk of bias
- Study flow diagram
- Funnel plot of mortality
- Forest plot of mortality
- Forest plot of mortality in randomized controlled trial
- Forest plot of mortality in non-randomized control trial
- Forest plot of Sequential Organ Failure Assessment score (SOFA)
- Forest plot of Cardiac Index (CI)
- Forest plot of Heart Rate (HR)
- Forest plot of Cardiac Power Index (CPI)
- Forest plot of Ejection Fraction (EF)
- Forest plot of End-Systolic Volume (ESV)
- Funnel plot of Mean Blood Pressure (MBP)
- Forest plot of Pulmonary Atrial Pressure (PAP)
- Funnel plot of mixed venous oxygen saturation (ScVO<sub>2</sub>)
- Forest plot of Pulmonary artery occlusion Pressure (PAOP)
- Forest plot of ICU days
- Forest plot of glomerular filtration rate (GFR)

**Full PubMed, Embase, search strategy**

(Levosimendan [Mesh]) AND (randomized controlled trial[pt] OR controlled clinical trial[pt] OR controlled trial[pt] OR randomized controlled trials[mh] OR random allocation[mh] OR double-blind method[mh] OR single blind method[mh] OR clinical trial[pt] OR clinical trials[mh] OR (clinical trial[tw] OR ((singl\*[tw] OR doubl\*[tw] OR trebl\*[tw] OR tripl\*[tw])) AND (mask\*[tw] OR blind[tw])) OR (latin square[tw]) OR placebos[mh] OR placebo\*[tw] OR random\*[tw] OR research design[mh:noexp] OR follow-up studies[mh] OR prospective studies[mh] OR “case control”[tw] OR match\*[tw] OR “case series”[tw] OR OR control\*[tw] OR prospectiv\*[tw] OR volunteer\*[tw])) NOT (animal[mh] NOT human[mh])

## Major exclusions and reasons for exclusions

Thirty trials were excluded because of:

- 18 Not Randomized Controlled Trials [1–18]
- 6 Case report [19-24]
- 3 Study design problems [25-27]
- 3 duplicate publication [28-30]

Supplemental references: all excluded trials

1. Summaria F, Mustilli M, Sette A, etc. Early ‘ in-lab’ use of levosimendan in patients with cardiogenic shock unsuitable for intra-aortic balloon pump counterpulsation. *Ther Adv Cardiovasc* 2014 Feb;8(1):28-31
2. Taccone FS, Brasseur A, Vincent JL, etc. Levosimendan for the treatment of subarachnoid hemorrhage-related cardiogenic shock. *Intensive Care Med* 2013 Aug;39(8):1497-8
3. Liu Y, Liu B, Zhou H, etc. Continuous levosimendan infusion for refractory cardiogenic shock complicating severe acute dichlorvos poisoning. *Am J Med Sci* 2012 Aug;344(2):166-70
4. Rass MA, Prondzinsky R, Carter JM, etc. Right ventricular function in myocardial infarction complicated by cardiogenic shock: Improvement with levosimendan. *Crit Care Med* 2009 Dec;37(12):3017-23
5. Grief M, Zwermann L, Reithmann C, etc. Levosimendan as rescue therapy in severe cardiogenic shock after ST-elevation myocardial infarction. *Acute Card Care* 2008;10(3):185-90
6. Russ MA, Prondzinsky R, Christoph A, etc. Hemodynamic improvement following levosimendan treatment in patients with acute myocardial infarction and cardiogenic shock. *Crit Care Med* 2007; 35(12):2732-9
7. Dominguez-Rodriguez A, Samimi-Fard S, Garica-Gonzalez MJ, etc. Effects of levosimendan versus dobutamine on left ventricular diastolic function in patients with cardiogenic shock after primary angioplasty. *Int J Cardiol* 2008;128(2):214-7
8. Rokytka R Jr, Pechman V. The effects of Levosimendan on global haemodynamics in patients with cardiogenic shock. *Neuro Endocrinol Lett* 2006;27(1-2):121-7
9. Delle Karth G, Buberl A, Geppert A, etc. Hemodynamic effects of a continuous infusion of levosimendan in critically ill patients with cardiogenic shock requiring catecholamines. *Acta Anaesthesiol Scand* 2003;47(10):1251-6
10. Antonini M, Stazi GV, Cirasa MT, etc. Efficacy of levosimendan in Takotsubo-related cardiogenic shock. *Acta Anaesthesiol Scand* 2010;54(1): 119-20
11. Lehmann A, Lang J, Boldt J, etc. Levosimendan in patients with cardiogenic shock undergoing surgical revascularization: a case series. *Med Sci Monit* 2004; 10(8):MT 89-93
12. Alhashemi JA. Treatment of cardiogenic shock with levosimendan in combination with beta-adrenergic antagonists. *Br J Anaesth* 2005; 95(5):648-50
13. Tsagalou EP, Kanakakis J, Anastasiou-Nana MI, etc. Hemodynamic effects of levosimendan in acute myocardial infarction complicated by cardiogenic shock and high systemic vascular resistance. *Acute Card Care* 2009; 11(2): 99-106

14. Carcia-Gonzalez MJ, Dominguez-Rodriguez A, Ferrer-Hita JJ, etc. Cardiogenic shock after primary percutaneous coronary intervention: Effects of levosimendan compared with dobutamine on haemodynamics. *Eur J Heart Fail* 2006; 8(7): 723-8
15. Zobel C, Reuter H, Schwinger RH. Treatment of cardiogenic shock with the Ca<sup>2+</sup> sensitizer levosimendan. *Med Klin(Munich)* 2004; 99(12): 742-6
16. Marco Grazi, Gianfranco Lauri, Corrado Carbucicchio, etc. Use of Levosimendan for Treatment of Cardiogenic Shock Associated with Electrical Storm. *Ann Intern Med* 2009; 150(10): 738-740
17. Vincenzo De Santis, Domenico Vitale, Luigi Tritapepe, etc. Use of Levosimendan for Cardiogenic Shock in a Patient with the Apical Ballooning Syndrome. *Ann Intern Med* 2008; 149(5): 365-367
18. Garcia-Gonzalez MJ, Dominguez-Rodriguez A, Ferrer-Hita JJ. Utility of levosimendan, a new calcium sensitizing agent, in the treatment of cardiogenic shock due to myocardial stunning in patients with ST-elevation myocardial infarction: a series of cases. *J Clin Pharmacol* 2005; 45(6): 704-8
19. Taha A, Shafie A, Mostafa M, etc. Assessment of levosimendan as a therapeutic option to recruit the microcirculation in cardiogenic shock-initial experience in cardiac ICU. *Critical Care* 2016 20 SUPPL.2
20. Poli M, Trambaiolo P, Basso V, etc. Dobutamine versus levosimendan in weaning of difficult-to-wean ventilator dependent patients with cardiogenic shock complicated by respiratory failure after stemi. *Giornale Italiano di Cardiologia* 2014; 15:4 SUPPLE.2
21. Marzorati C, Erba L, Cortinovis B, etc. Levosimendan infusion during ECMO weaning: Effect on endothelial function and haemodynamics. *Applied Cardiopulmonary Pathophysiology* 2013 17:2(170-171)
22. Husebye T, Eritsland J, Arnesen H, etc. Levosimendan improves regional contractility in patients with acutely revascularised infarction complicated by decompensated heart failure. *European Journal Heart Failure, Supplement* 2012 11 SUPPL.1(S238-)
23. Russ M.A, Prondzinsky R, Carter J.M, etc. Right ventricular function in myocardial infarction complicated by cardiogenic shock: Improvement with levosimendan. *Critical Care Medicine* 2009 37; 12(3017-3023)
24. JA Alhashemi, Q Alotaibi. Effects of levosimendan in acute heart failure and cardiogenic and septic shock. *Crit Care* 2008; 12(Suppl 2): P267
25. Lehmann A, Kiessling A.H, Isgro F, etc. Levosimendan in patients with acute myocardial ischaemia undergoing emergency surgical revascularization. *European Journal of Anaesthesiology* 2008 25:3(224-229)
26. Garcia-Gonzalez M.J., Dominguez-Rodriguez A, Ferrer-Hita J.J, etc. Cardiogenic shock after primary percutaneous coronary intervention: Effects of levosimendan compared with dobutamine on haemodynamics. *European Journal of Heart Failure* 2006 8:7(723-728)
27. Mclean AS, Nalos M, Huang S.J, etc. The use of levosimendan in shocked patients with compromised left ventricular function and requiring catecholamine support- A case series. *Critical Care and Shock* 2005 8:1(6-13)
28. I Labbene, M Bel hadj Amor, S Dhahri, etc. Hemodynamic and echographic effects of levosimendan in patients with cardiogenic shock refractory to catecholamines. *Critical Care* 2006 10 (Suppl 1) :P358
29. Grant CA, Price J, Jeanrenaud P, etc. A randomized controlled trial of levosimendan versus enoximone in cardiogenic shock-a pilot study *Intensive care medicine* 2008; 34(Suppl 1), S252
30. Buerke M, Prondzinsky R. Levosimendan in cardiogenic shock: better than enoximone. *Crit Care Med* 2008; 36(8):2450-1

1. Affronti A, di Bella I, Carino D, etc. Levosimendan may improve weaning outcomes in venoarterial ECMO patients. *ASAIO J* 2013 Nov-Dec;59(6):554-7
2. Omerovic E, Ramunddal T, Albertsson P, etc. Levosimendan neither improves nor worsens mortality in patients with cardiogenic shock due to ST-elevation myocardial infarction. *Vasc Health Risk Manag* 2010 Sep;7(6):657-63
3. Husebye T, Eritsland J, Muller C, etc. Levosimendan in acute heart failure following primary percutaneous coronary intervention treated acute ST-elevation myocardial infarction. Results from the LEAF trial: a randomized, placebo-controlled study. *European Journal of Heart Failure* 2013;15:565-572
4. Fuhrmann JT, Schmeisser A, Schulze MR, etc. Levosimendan is superior to enoximone in refractory cardiogenic shock complicating acute myocardial infarction. *Crit Care Med* 2008; 36(8):2257-66
5. Christoph A, Prondzinsky R, Russ M, etc. Early and sustained haemodynamic improvement with levosimendan compared to intraaortic balloon counterpulsation (IABP) in cardiogenic shock complicating acute myocardial infarction. *Acute Cardiac Care* 2008;10:49-57
6. Samimi-Fard S, Garcia-Gonzalez MJ, Dominguez-Rodriguez A, etc. Effects of levsimendan versus dobutamine on long-term survival of patients with cardiogenic shock after primary coronary angioplasty. *Int J Cardiol* 2008; 127(2): 284-7
7. P Soos, D Becker, G Barczy, etc. Levosimendan therapy does not improve survival of post-resuscitation cardiogenic shock patients. *Critical Care* 2009 13(Suppl 1):P172
8. Poli M, Trambaiolo P, Mustili M, etc. Mixed venous oxygen saturation. its role in the assessment of patients developing after ST-elevation myocardial infarction (STEMI). *Giornale Italiano di Cardiologia* 2011 12:5 SUPPL.1(39S-40S)
9. Caetano F, Almeida I, Silva J, etc. Cardiogenic shock in acute myocardial infarction: Still looking for the best inotrope. *European Heart Journal: Acute Cardiovascular Care* 2012 1 SUPPL.1(28-29)
10. Igor Katsytadze, Ekaterina Amosova, Igor Prudkyi, etc. Long term effects of levosimendan therapy in patients with cardiogenic shock. *Resuscitation* 84S(2013)S11
11. Massimo Mancone, Mauro Pennachhi, Luigi Lucisano, etc. Hemodynamic improvement following levosimendan treatment in acute myocardial infraction complicated by cardiogenic shock patients treated with primary PCI and IABP. *JACC* 2013; Volume 61, Issue 10
12. Li Peng, Li Rui, Zhou Yongguang, etc. Levosimendan for Treating Acute Myocardial Infarction Complicated by Cardiogenic Shock in 54 Cases. *Drug Rearch* 2015;9(5):46-47
13. 罗毅, 刘路培, 杨振宇等。左西孟旦对急性心肌梗死并发心源性休克患者的疗效。实用医学杂志 2013 ; 第 29 卷 19 期 : 3229-3230

## Study quality and risk of bias

### Assess of risk of bias for RCT

| Study                | Bias                                   | Author's judgement | Support for judgement                                                       |
|----------------------|----------------------------------------|--------------------|-----------------------------------------------------------------------------|
| 2008 Fuhrmann        | Random sequence generation             | Low                | Randomised controlled trial                                                 |
| High risk of bias    | Allocation concealment                 | Unclear            | Not stated                                                                  |
|                      | Blinding of participants and personnel | High               | Open-label trial                                                            |
|                      | Blinding of outcome assessment         | High               | Open-label trial                                                            |
|                      | Incomplete outcome data                | Low                | Trial data is completed                                                     |
|                      | Selective reporting                    | Low                | Apparently free of selecting reporting                                      |
|                      | Other bias                             | High               | Sample size not stated                                                      |
| 2008 Samimi-Fard     | Random sequence generation             | Low                | Randomised controlled trial                                                 |
| High risk of bias    | Allocation concealment                 | Unclear            | Not stated                                                                  |
|                      | Blinding of participants and personnel | High               | Open-label trial                                                            |
|                      | Blinding of outcome assessment         | High               | Open-Label trial                                                            |
|                      | Incomplete outcome data                | Low                | Trial data is completed                                                     |
|                      | Selective reporting                    | Low                | Apparently free of selecting reporting                                      |
|                      | Other bias                             | Unclear            | Insufficient information to assess whether a important risk of bias exists. |
| 2013 Husebye         | Random sequence generation             | Low                | randomised controlled trial                                                 |
| Low risk of bias     | Allocation concealment                 | Low                | randomised controlled trial                                                 |
|                      | Blinding of participants and personnel | Low                | Double Blind                                                                |
|                      | Blinding of outcome assessment         | Low                | Double Blind                                                                |
|                      | Incomplete outcome data                | Low                | Data is completed                                                           |
|                      | Selective reporting                    | Low                | Apparently free of selecting reporting                                      |
|                      | Other bias                             | Low                | Sample size not stated.                                                     |
| 2013 Luo             | Random sequence generation             | Low                | Randomized controlled trial                                                 |
| Unclear risk of bias | Allocation concealment                 | Unclear            | Not stated                                                                  |
|                      | Blinding of participants and personnel | Unclear            | Not stated                                                                  |
|                      | Blinding of outcome assessment         | Unclear            | Not stated                                                                  |
|                      | Incomplete outcome data                | Low                | Data is completed                                                           |
|                      | Selective reporting                    | Unclear            | Not stated                                                                  |
|                      | Other bias                             | Unclear            | Insufficient information to assess whether an important risk of bias        |
| 2015 Li              | Random sequence generation             | Low                | Randomized controlled trial                                                 |
| Unclear risk of bias | Allocation concealment                 | Unclear            | Not stated                                                                  |

bias

|                                        |         |                                                                      |
|----------------------------------------|---------|----------------------------------------------------------------------|
| Blinding of participants and personnel | Unclear | Not stated                                                           |
| Blinding of outcome assessment         | Unclear | Not stated                                                           |
| Incomplete outcome data                | Low     | Data is completed                                                    |
| Selective reporting                    | Low     | Apparently free of selecting reporting                               |
| Other bias                             | Unclear | Insufficient information to assess whether an important risk of bias |

# Assess of risk of bias for nRCT

| Study     | Selection                                               | Star Number |
|-----------|---------------------------------------------------------|-------------|
| 2008      | Is the Case Definition Adequate?                        | *           |
| Christoph |                                                         |             |
| 6 □       | Representativeness of the Case                          | *           |
|           | Selection of Controls                                   |             |
|           | Definition of Controls                                  | *           |
|           | <i>COMPARABILITY</i>                                    |             |
|           | Comparability of Cases and Controls on the Basis of the | * *         |
|           | Design or Analysis                                      |             |
|           | <i>EXPOSURE</i>                                         |             |
|           | Ascertainment of exposure                               | *           |
|           | Same method of ascertainment for cases and controls     | *           |
|           | Non-Response rate                                       |             |
| Study     | Selection                                               | Star number |
| 2008 Soos | Is the Case Definition Adequate?                        | *           |
| 5 □       | Representativeness of the Case                          | *           |
|           | Selection of Controls                                   |             |
|           | Definition of Controls                                  |             |
|           | <i>COMPARABILITY</i>                                    |             |
|           | Comparability of Cases and Controls on the Basis of the | * *         |
|           | Design or Analysis                                      |             |

## *EXPOSURE*

Ascertainment of exposure

Same method of ascertainment for cases and controls \*

Non-Response rate

|       |          |             |
|-------|----------|-------------|
| Study | Selecion | Star number |
|-------|----------|-------------|

|      |                                  |  |
|------|----------------------------------|--|
| 2010 | Is the Case Definition Adequate? |  |
|------|----------------------------------|--|

Omerovic

|     |                                |   |
|-----|--------------------------------|---|
| 5 □ | Representativeness of the Case | * |
|-----|--------------------------------|---|

Selection of Controls

|                        |   |
|------------------------|---|
| Definition of Controls | * |
|------------------------|---|

## *COMPARABILITY*

Comparability of Cases and Controls on the Basis of the \* \*

Design or Analysis

## *EXPOSURE*

Ascertainment of exposure

Same method of ascertainment for cases and controls \*

Non-Response rate

|       |           |             |
|-------|-----------|-------------|
| Study | Selection | Star number |
|-------|-----------|-------------|

|           |                                  |   |
|-----------|----------------------------------|---|
| 2011 Poli | Is the Case Definition Adequate? | * |
|-----------|----------------------------------|---|

|     |                                |   |
|-----|--------------------------------|---|
| 5 □ | Representativeness of the Case | * |
|-----|--------------------------------|---|

Selection of Controls

|                        |   |
|------------------------|---|
| Definition of Controls | * |
|------------------------|---|

## *COMPARABILITY*

Comparability of Cases and Controls on the Basis of the

Design or Analysis

## *EXPOSURE*

Ascertainment of exposure \*



|          |                                                                            |             |
|----------|----------------------------------------------------------------------------|-------------|
|          | Same method of ascertainment for cases and controls                        | *           |
|          | Non-Response rate                                                          |             |
| Study    | Selection                                                                  | Star number |
| 2012     | Is the Case Definition Adequate?                                           |             |
| Caetano  |                                                                            |             |
| 4□       | Representativeness of the Case                                             | *           |
|          | Selection of Controls                                                      | *           |
|          | Definition of Controls                                                     |             |
|          | <i>COMPARABILITY</i>                                                       |             |
|          | Comparability of Cases and Controls on the Basis of the Design or Analysis |             |
|          | <i>EXPOSURE</i>                                                            |             |
|          | Ascertainment of exposure                                                  | *           |
|          | Same method of ascertainment for cases and controls                        | *           |
|          | Non-Response rate                                                          |             |
| Study    | Selection                                                                  | Star number |
| 2013     | Is the Case Definition Adequate?                                           | *           |
| Affronti |                                                                            |             |
| 7□       | Representativeness of the Case                                             | *           |
|          | Selection of Controls                                                      |             |
|          | Definition of Controls                                                     | *           |
|          | <i>COMPARABILITY</i>                                                       |             |
|          | Comparability of Cases and Controls on the Basis of the Design or Analysis | * *         |
|          | <i>EXPOSURE</i>                                                            |             |
|          | Ascertainment of exposure                                                  | *           |
|          | Same method of ascertainment for cases and controls                        | *           |

## Non-Response rate

| Study | Selection                        | Star number |
|-------|----------------------------------|-------------|
| 2013  | Is the Case Definition Adequate? | *           |

Katstadze

|    |                                |   |
|----|--------------------------------|---|
| 6□ | Representativeness of the Case | * |
|    | Selection of Controls          |   |
|    | Definition of Controls         | * |

## *COMPARABILITY*

|                                                         |     |
|---------------------------------------------------------|-----|
| Comparability of Cases and Controls on the Basis of the | * * |
| Design or Analysis                                      |     |

## *EXPOSURE*

|                                                     |   |
|-----------------------------------------------------|---|
| Ascertainment of exposure                           | * |
| Same method of ascertainment for cases and controls |   |
| Non-Response rate                                   |   |

| Study | Selection                        | Star number |
|-------|----------------------------------|-------------|
| 2013  | Is the Case Definition Adequate? | *           |

Mancone

|    |                                |   |
|----|--------------------------------|---|
| 5□ | Representativeness of the Case | * |
|    | Selection of Controls          |   |
|    | Definition of Controls         | * |

## *COMPARABILITY*

|                                                         |  |
|---------------------------------------------------------|--|
| Comparability of Cases and Controls on the Basis of the |  |
| Design or Analysis                                      |  |

## *EXPOSURE*

|                                                     |   |
|-----------------------------------------------------|---|
| Ascertainment of exposure                           | * |
| Same method of ascertainment for cases and controls | * |
| Non-Response rate                                   |   |

**Follow-up for the mortality**

| Study            | Follow-up                        |
|------------------|----------------------------------|
| 2008 Christoph   | Hospital stay                    |
| 2008 Joerg T     | 30d all-cause mortality          |
| 2008 Samimi-Fard | 12-months cardiac death          |
| 2009 Soos        | 200-day mortality                |
| 2010 Omerovic    | 30-day mortality                 |
| 2011 Poli        | In-hospital mortality            |
| 2012 Caetano     | In-hospital mortality            |
| 2013 Husebye     | 6-month mortality                |
| 2013 Affronti    | In-hospital mortality            |
| 2013 Katsytadze  | 1-year mortality                 |
| 2013 Mancone     | 1-month Cardiovascular mortality |
| 2013 Luo         | No metality                      |
| 2015 Li          | No metality                      |

Study flow diagram

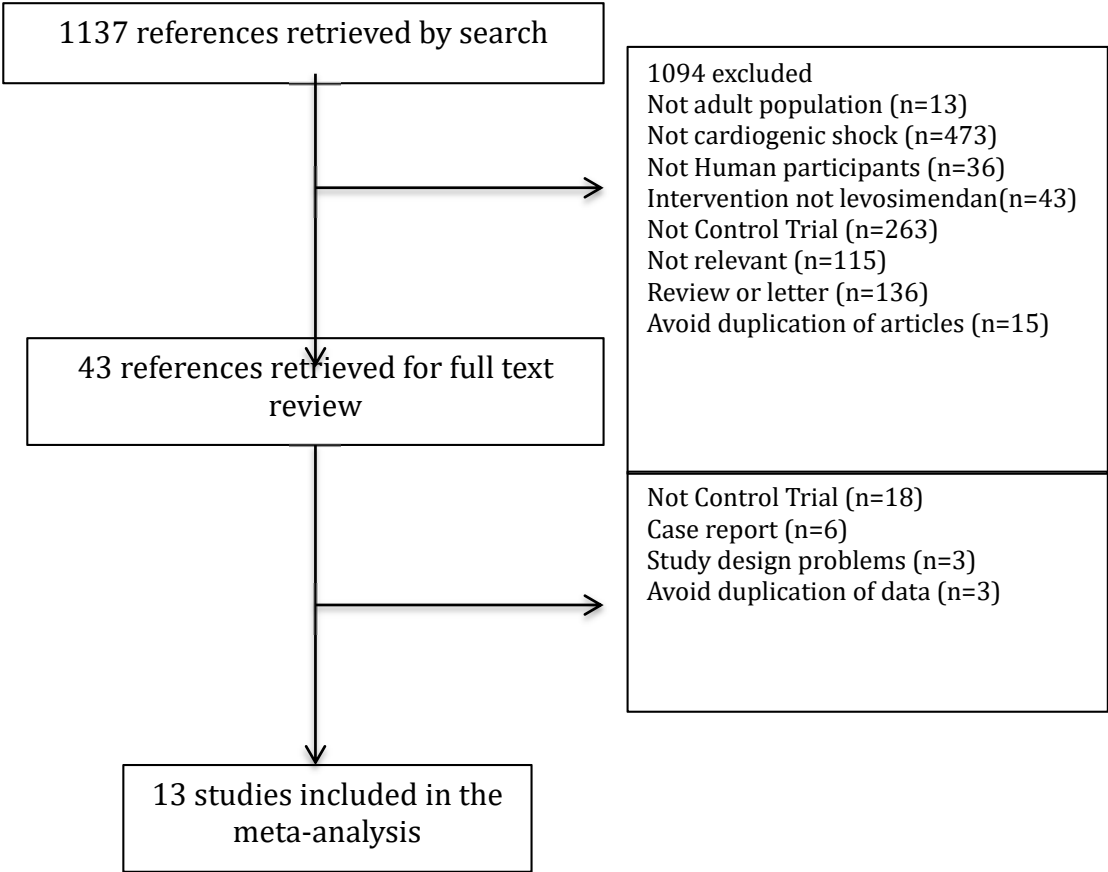

Funnel plot of mortality

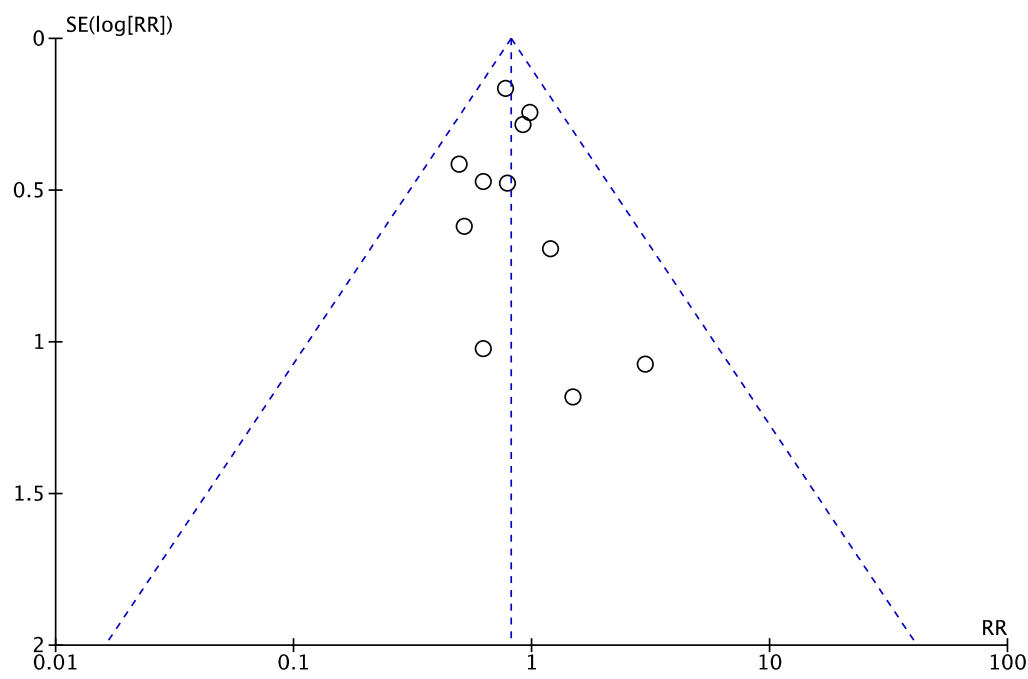

Forest Plot of Mortality

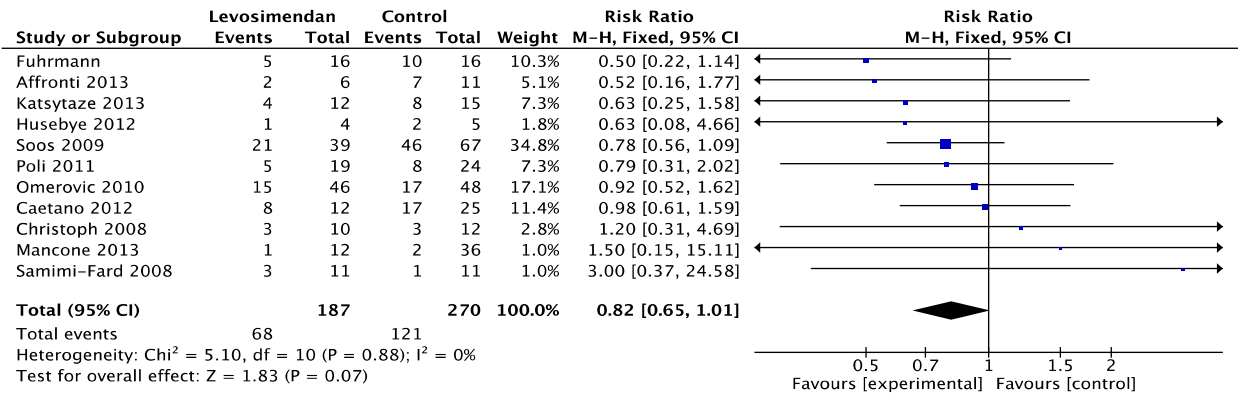

Forest plot of mortality in RCTs

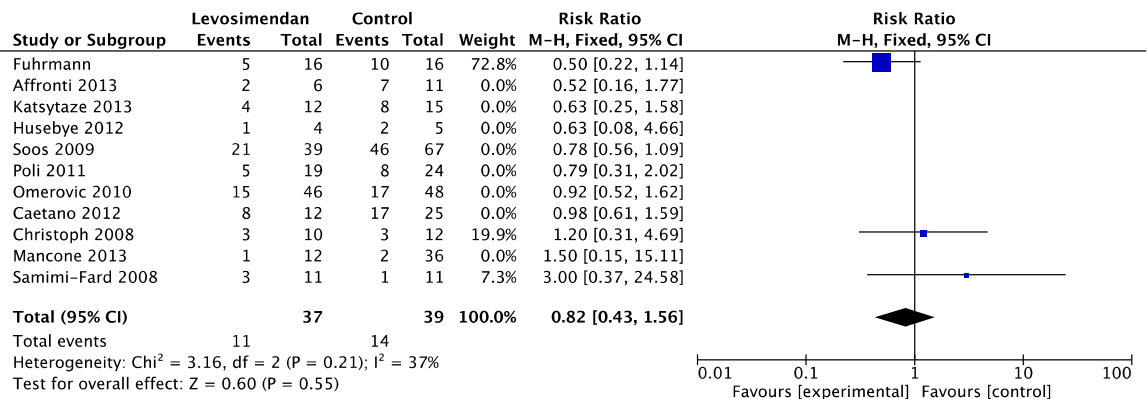

Forest plot of mortality in nRCTs

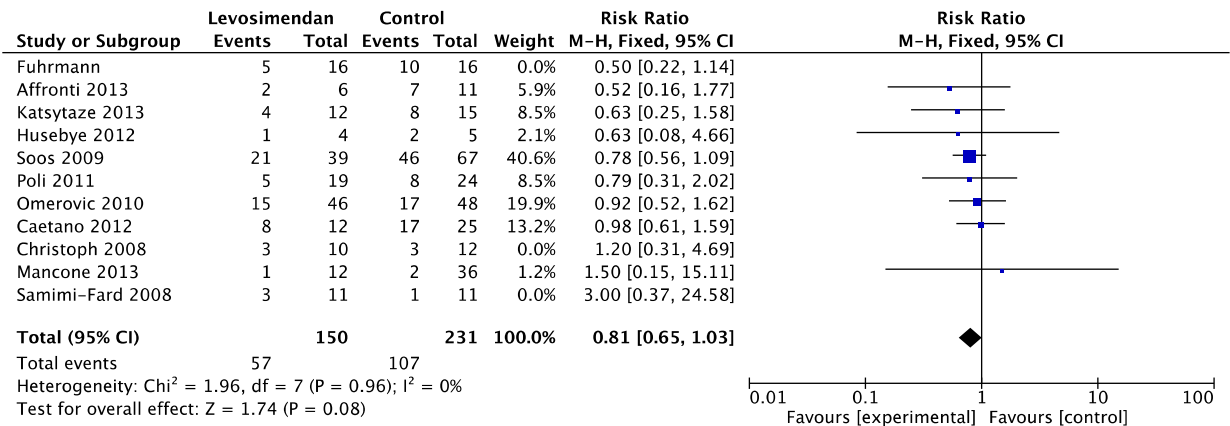



Forest plot of Sequential Organ Failure Assessment (SOFA) score

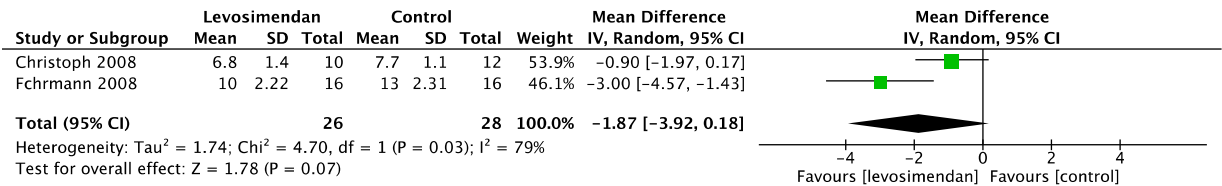

Forest plot of Cardiac Index (CI)

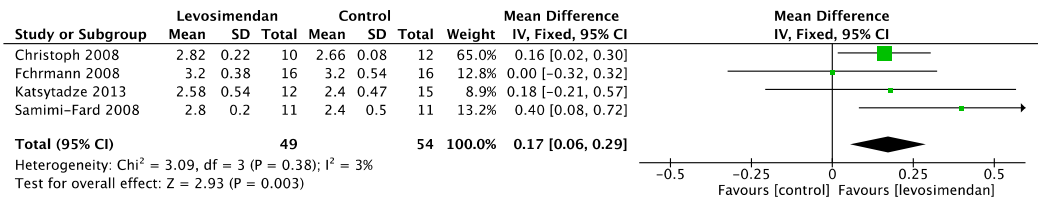

Forest plot of Heart Rate (HR)

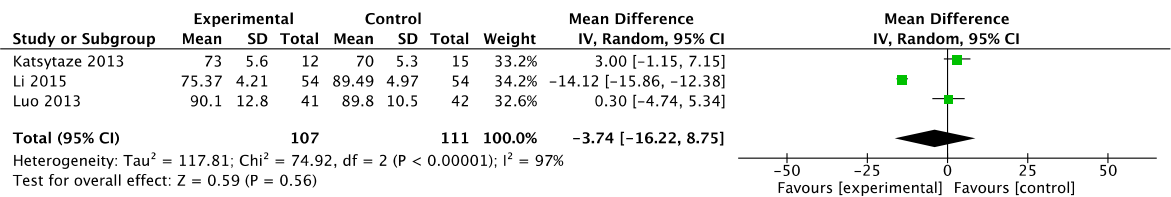

Forest plot of Cardiac Powder Index (CPI)

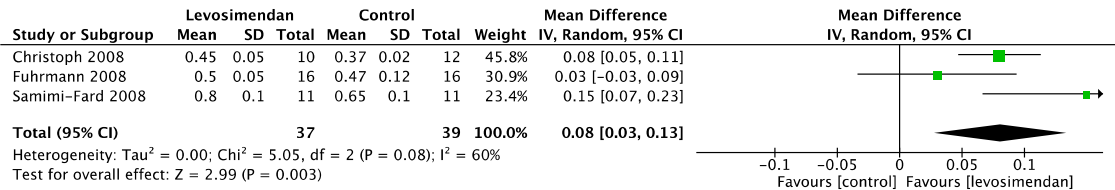

Forest plot of Ejection Fraction (EF)

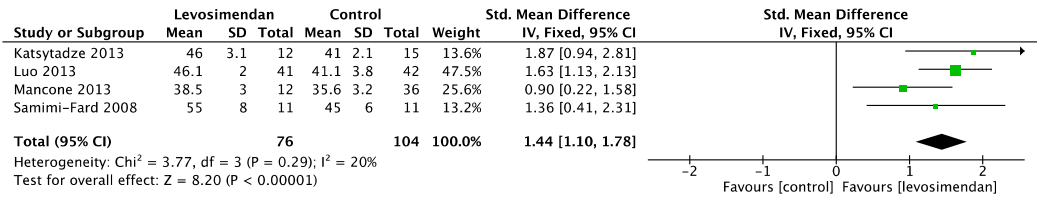

Forest plot of End-Systolic Volume (ESV)

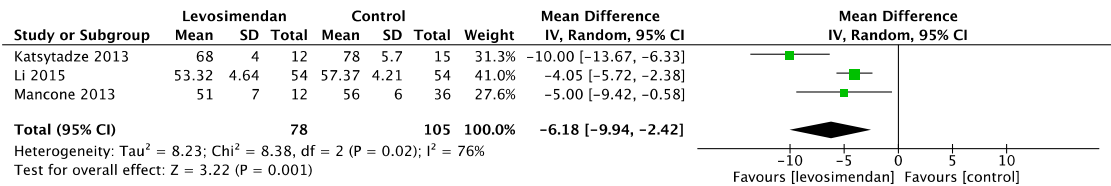

Forest plot of Mean Blood Pressure (MBP)

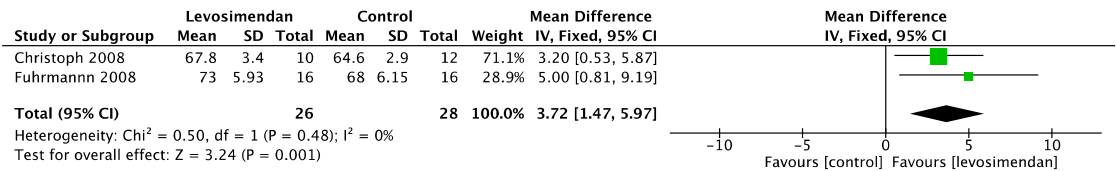

Forest plot of Pulmonary Atrial Pressure (PAP)

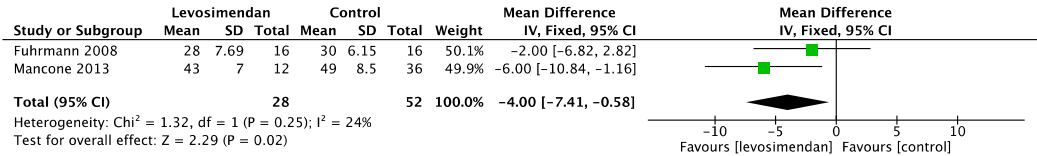



Forest plot of mixed venous oxygen saturation (ScvO2)

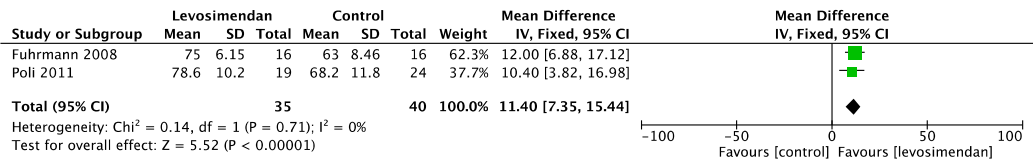

Forest plot of Pulmonary artery occlusion Pressure (PAOP)

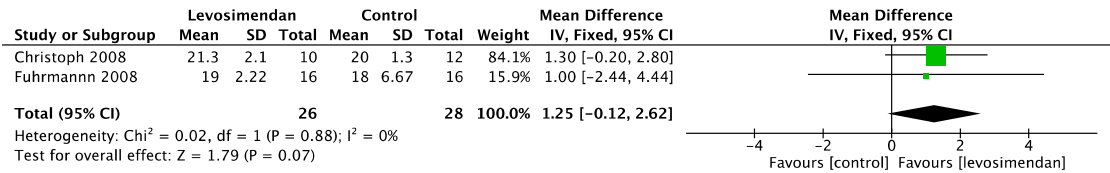

Forest plot of ICU days

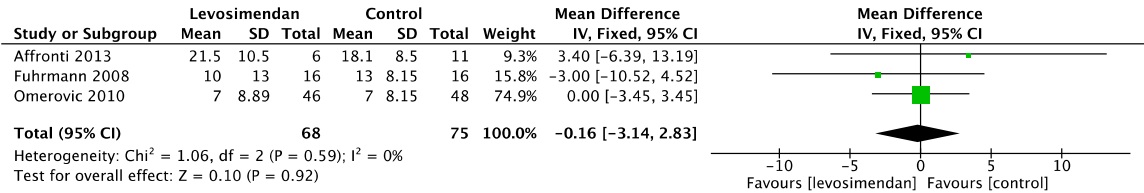

Forest plot of glomerular filtration rate(GFR)

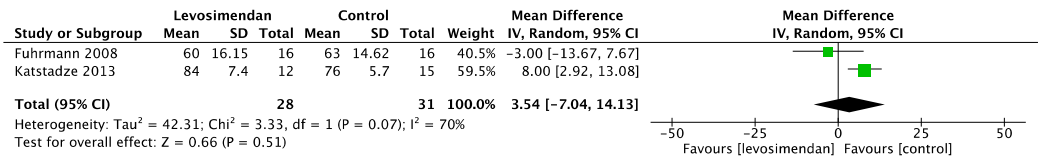

Supplement: mmc1 [file S2173572718301681:mmc1.pdf]
